# Supplementary material
Source: publisher site journal article supplement (https://www.dovepress.com/article/459914)
Supplement: Supplementary file 1 [file get_supplementary_file.php]

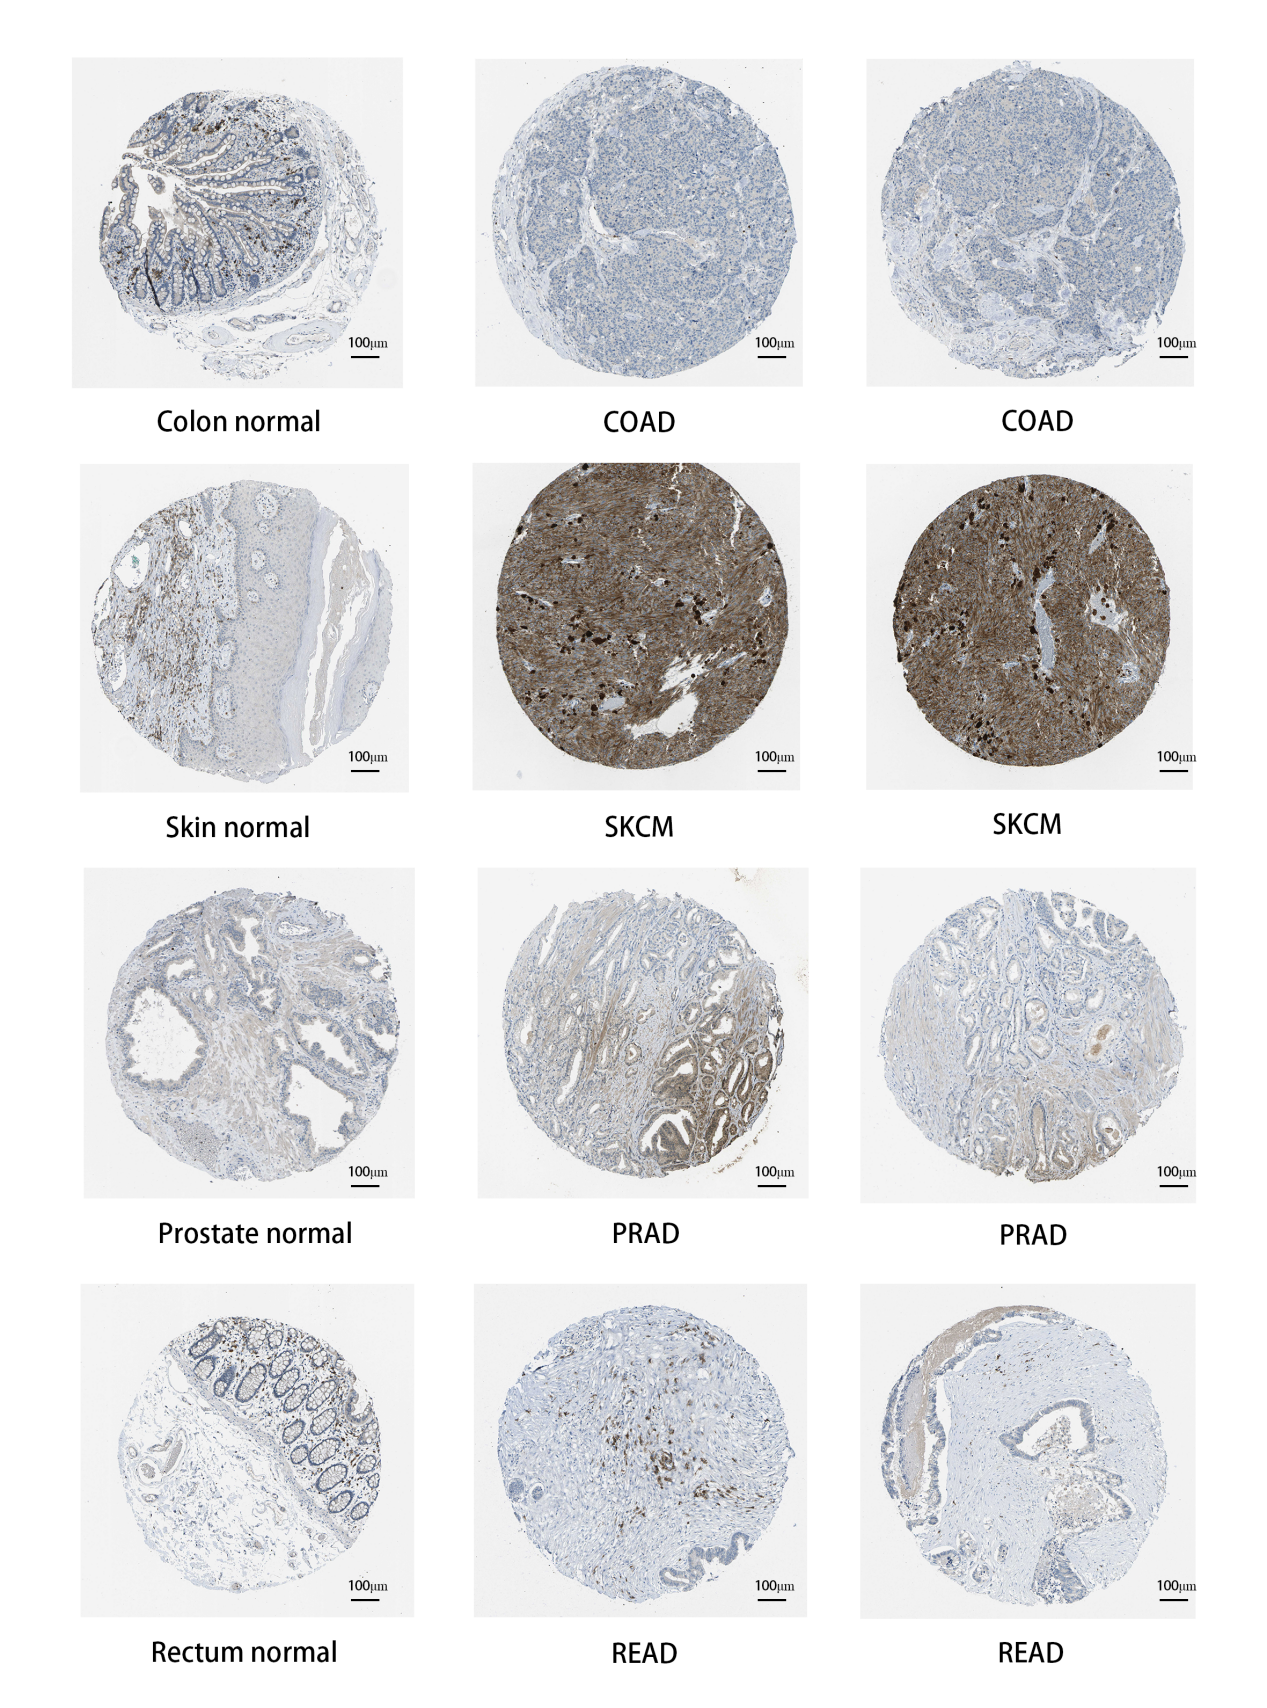


Supplementary Figure 1 | The HPA database was used to verify the protein expression of CD19.


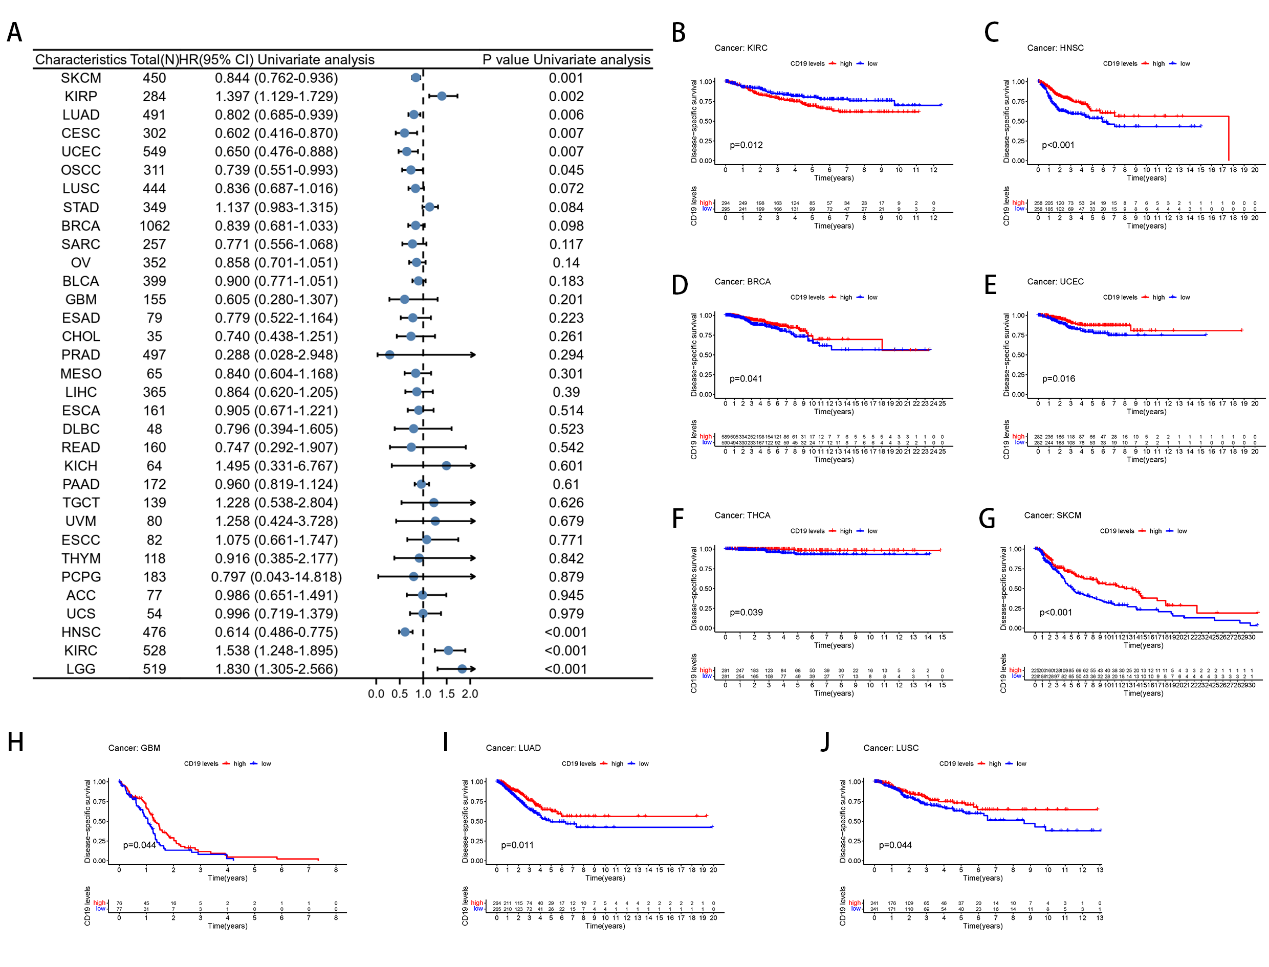


Supplementary Figure 2 | Relationship between CD19 expression and the disease-specific survival (DSS) of patients. (A) Forest plot showing the results of the univariate Cox regression analysis of CD19 in pancancer samples from the TCGA database. (B-J) Kaplan‒Meier curves illustrating the association of CD19 with DSS in pancancer samples.


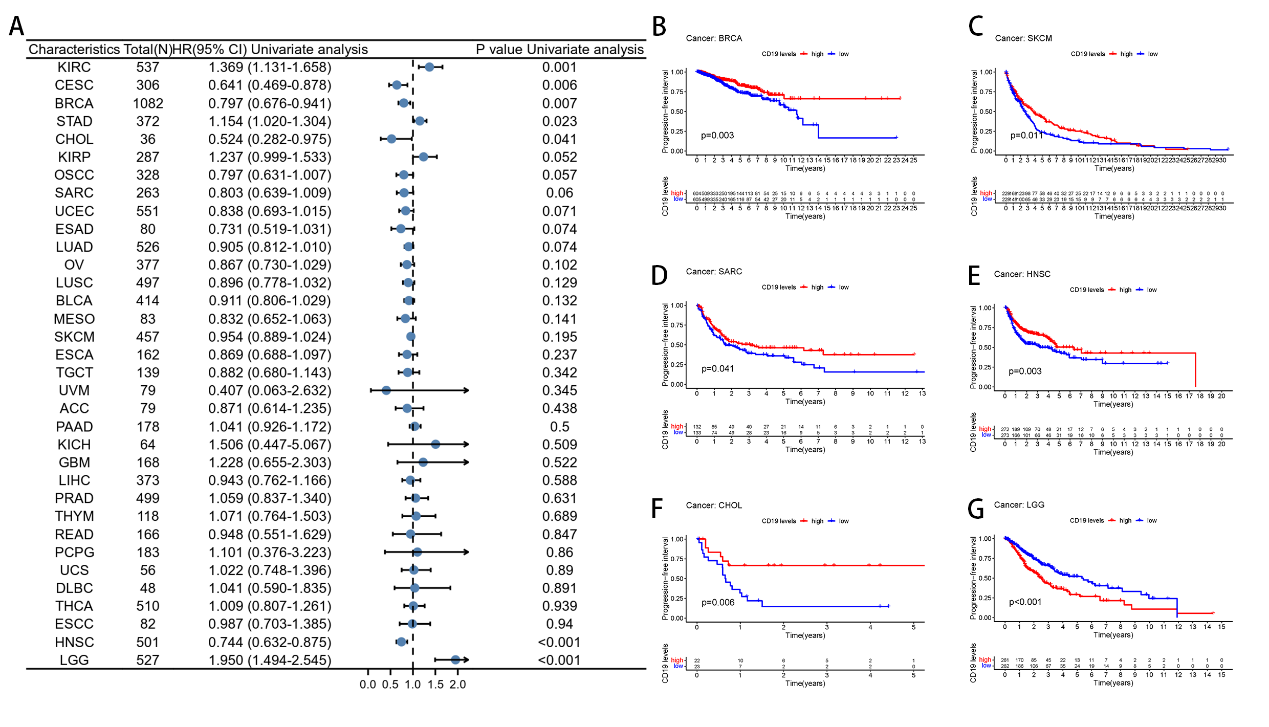


Supplementary Figure 3 | Relationship between CD19 expression and the platinum-free interval (PFI) of patients. (A) Forest plot showing the results of the univariate Cox regression analysis of CD19 in pancancer samples from the TCGA database. (B-G) Kaplan‒Meier curves of CD19 expression in association with PFI across cancers.


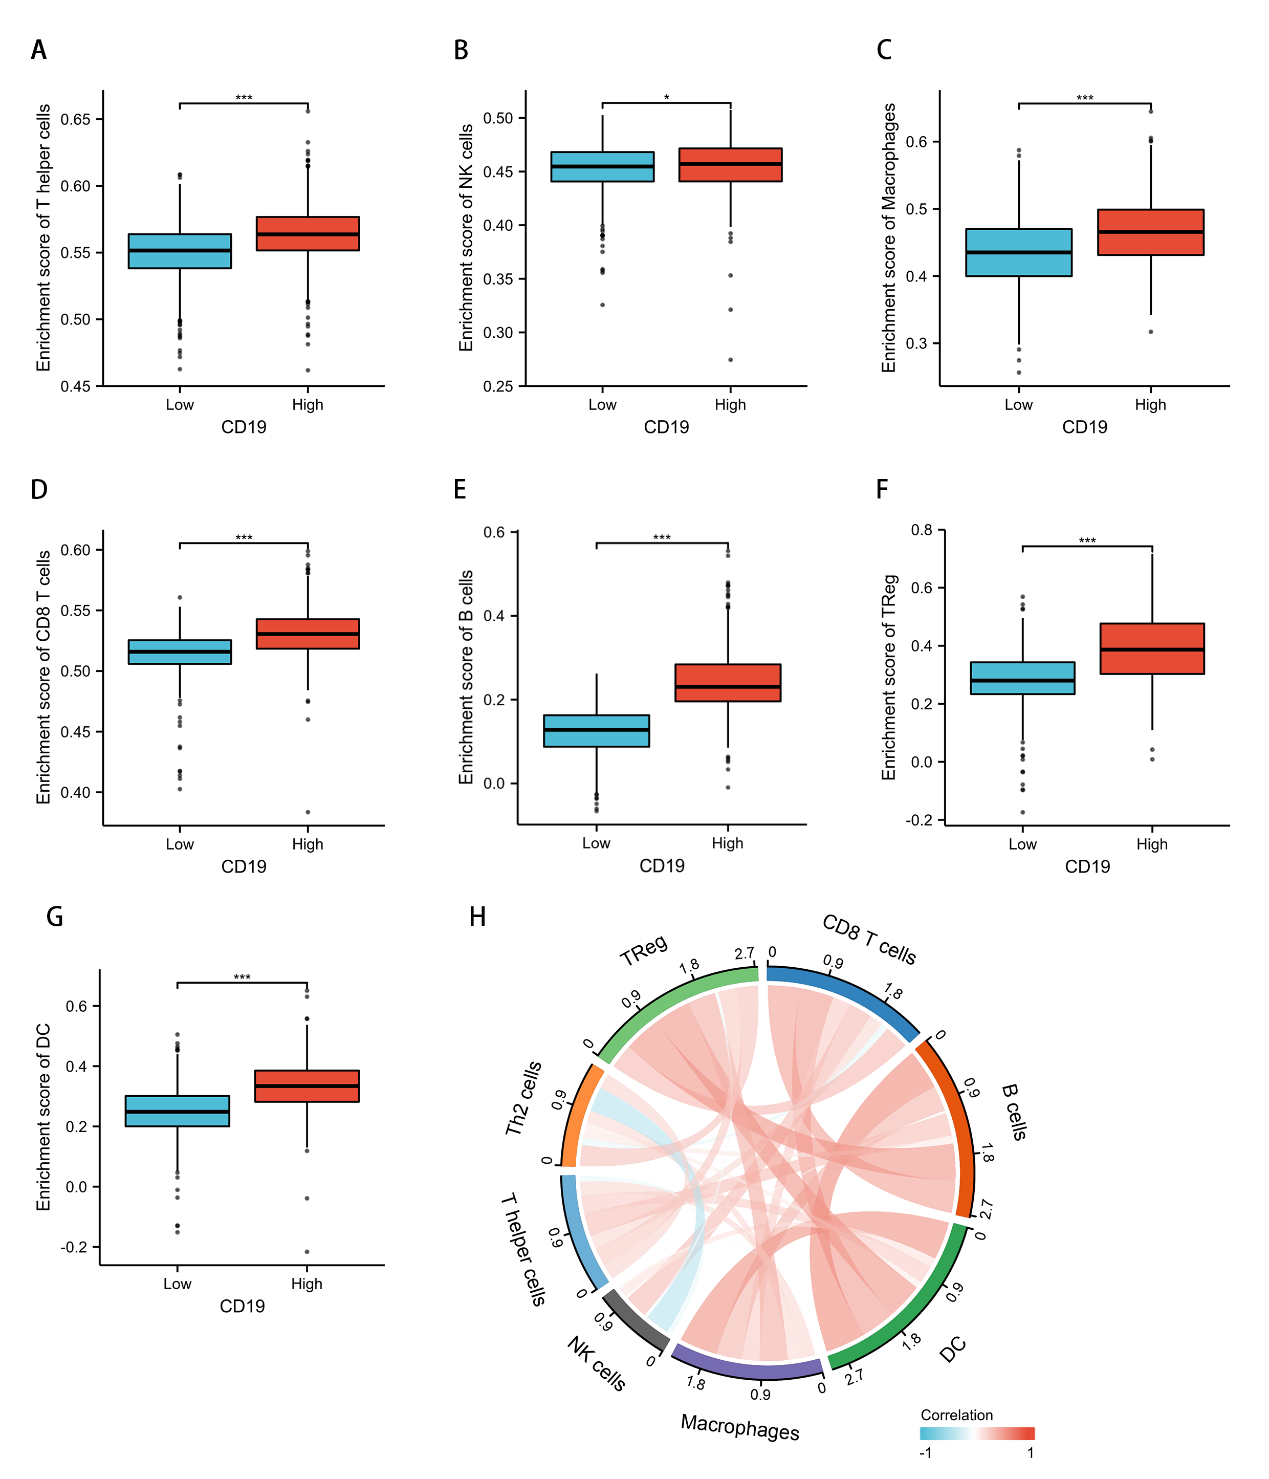


Supplementary Figure 4 | Correlation between CD19 expression in BRCA and immune cell infiltration in the TME. (A) Follicular helper T cells, (B) NK cells, (C) macrophages, (D) CD8(+) T cells, (E) B cells, (F) Treg cells, (G) DCs, (H) Correlation of different immune cells in BRCA. **p* < 0.05 and ****p* < 0.001.
